# Supplementary material for: Fabrication and growth mechanism of hierarchical porous Fe3O4 hollow sub-microspheres and their magnetic properties
Source: Royal Society of Chemistry journal article supplement (doi:10.1039/c1ce05119a), 2011-01-01
Supplement: c1ce05119a.pdf [file c1ce05119a.pdf]

# Fabrication and growth mechanism of hierarchical porous Fe<sub>3</sub>O<sub>4</sub> hollow sub-microspheres and their magnetic properties

Yong Wang,<sup>ab</sup> Qingshan Zhu<sup>\*b</sup> and Ling Tao<sup>b</sup>

<sup>a</sup> *Department of Chemistry, Capital Normal University, Beijing 100048, China.*

<sup>b</sup> *State Key Laboratory of Multiphase Complex System, Institute of Process Engineering, Chinese Academy of Sciences, Beijing 100080, China.*

## S1. XRD patterns of the products with different reaction times

The formation process of hierarchical porous Fe<sub>3</sub>O<sub>4</sub> hollow sub-microspheres is indicated in the following series of experiments (2.0 mmol of Fe(acac)<sub>3</sub> was dissolved in 20 mL of diphenyl ether to form a solution, then 10.0 mmol of 1,6-hexanediol was added into the solution. The resulting mixture was then sealed into a 50 mL Teflon-lined autoclave. After that, the autoclave was transferred to an electric oven at 220 °C and kept for 1h, 3h, 4h and 10h respectively). Fig. S1 displays the X-ray diffraction (XRD) patterns of hierarchical porous Fe<sub>3</sub>O<sub>4</sub> hollow sub-microspheres prepared at 220°C with reaction time of 1h, 3h, 4h and 10h respectively. The XRD patterns clearly show the phase transformation from Fe<sub>2</sub>O<sub>3</sub> to Fe<sub>3</sub>O<sub>4</sub> (Fig. S1, ESI). All four systems give the same transformation trend, which means that the pure Fe<sub>2</sub>O<sub>3</sub> is the only template in forming Fe<sub>3</sub>O<sub>4</sub> hollow sub-microspheres. In Fig. S1a, the sample prepared at 220°C with reaction time of 1h is identified as single phase Fe<sub>2</sub>O<sub>3</sub> with rhombohedral structure (a =5.038 Å, c=13.772 Å, JCPDS file No. 24–0072). No peaks from other phases are found, indicating that the as-obtained solid sub-microspheres are single phase α-Fe<sub>2</sub>O<sub>3</sub>. In Fig. S1b, XRD analyses indicate that the as-obtained sample is a mixture with two phases, Fe<sub>2</sub>O<sub>3</sub> with rhombohedral structure (a =5.038 Å, c=13.772 Å, JCPDS file No. 24–0072, signal +) and Fe<sub>3</sub>O<sub>4</sub> with cubic structure (a=8.393 Å, JCPDS file No. 85-1436, signal #). The result confirms that the reductive reaction of hematite to magnetite occurs and an incompact layer of Fe<sub>3</sub>O<sub>4</sub> is formed on the surface of the initial α-Fe<sub>2</sub>O<sub>3</sub> particles. As shown in Fig. S1b-d, moreover, the crystallinity of the Fe<sub>3</sub>O<sub>4</sub> in the samples gradually increases

with the reaction time, which indicates that Ostwald ripening (crystallites grow at the expense of the smaller ones) is one of the underlying mechanisms in this hollowing process.

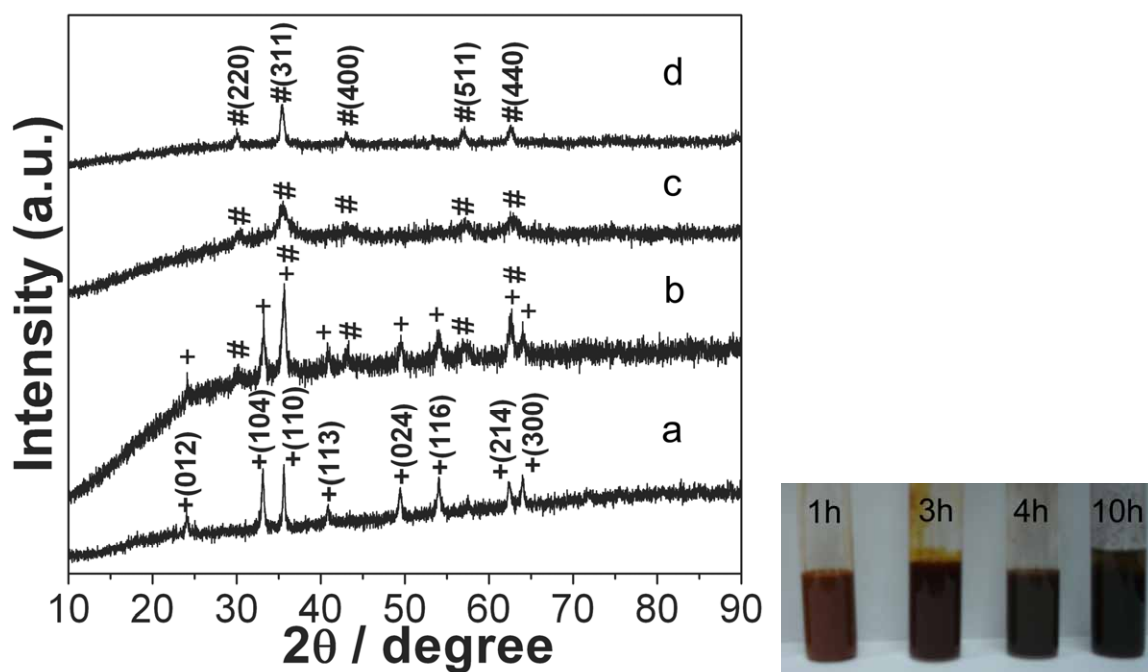

**Fig. S1** X-ray diffraction patterns of Fe<sub>3</sub>O<sub>4</sub> hierarchical hollow sub-microspheres prepared at 220°C with different experimental time: (a)1h; (b)3 h; (c) 4 h; (d) 10 h. Fe<sub>2</sub>O<sub>3</sub> (+) and Fe<sub>3</sub>O<sub>4</sub> (#).

## S2. Good dispersion of hierarchical Fe<sub>3</sub>O<sub>4</sub> hollow sub-microspheres

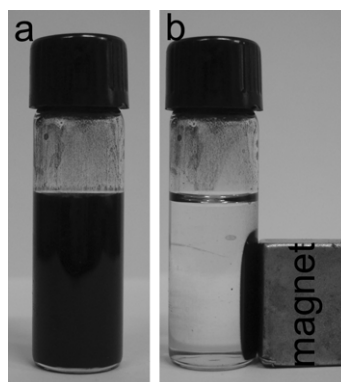

**Fig. S2** Photographs of sample (a) before and (b) after using an applied magnetic field for 30 s.
